# Supplementary material for: Relationships of virus titers and transmission rates among sympatric and allopatric virus isolates and thrips vectors support local adaptation
Source: PubMed Central journal article supplement (PMC7203134; doi:10.1038/s41598-020-64507-1), 2020-05-06
Supplement: 41598_2020_64507_MOESM1_ESM.pdf [file 41598_2020_64507_MOESM1_ESM.pdf]

**Relationships of virus titers and transmission rates among sympatric and allopatric virus isolates and thrips vectors support local adaptation**

Jessica A. Linak<sup>1</sup>, Alana L. Jacobson<sup>2</sup>, Tim L. Sit<sup>1</sup>, and George G. Kennedy<sup>1</sup>

<sup>1</sup>Department of Entomology and Plant Pathology, North Carolina State University, Raleigh, NC 27695-7630; <sup>2</sup>Department of Entomology and Plant Pathology, 301 Funchess Hall, Auburn University, Auburn, AL, 36849, USA

Contact Author: Alana L Jacobson [alj0043@auburn.edu](mailto:alj0043@auburn.edu)

**Table S1.** The tomato spotted wilt virus (TSWV) isolate-*Thrips tabaci* isolate-pairings included in this study, and the number of adult *T. tabaci* in each isolate that transmitted or did not transmit each TSWV isolate. Thrips and leaf tissue used in study are the same reported in Jacobson and Kennedy (2013) and were stored at -80°C until used in this study.

| TSWV Isolate | Thrips Isoline | Number of thrips |                 |       |
|--------------|----------------|------------------|-----------------|-------|
|              |                | Transmitting     | Nontransmitting | Total |
| AM1          | IPOC1*         | 5                | 5               | 10    |
| AM1          | Kin1           | 5                | 5               | 10    |
| AM1          | SH2            | 4                | 5               | 9     |
| AM1          | SH72           | 4                | 5               | 9     |
| SH3          | IPOC1          | 2                | 6               | 8     |
| SH3          | Kin1           | 1                | 4               | 5     |
| SH3          | SH2*           | 5                | 5               | 10    |
| SR3-3        | IPOC1*         | 3                | 5               | 8     |
| SR3-3        | Kin1           | 2                | 5               | 7     |
| SR3-3        | SH2            | 4                | 5               | 9     |
| SR3-3        | SH72           | 3                | 6               | 9     |
| SHP          | SH2*           | 6                | 5               | 11    |
| Totals       |                | 44               | 61              | 105   |

**Table S2.** *Frankliniella occidentalis* primers tested as possible internal control genes for *Thrips tabaci* qPCR experiments.

| Gene                                 | Primer Name           | Primer Sequence (5'-3')                                   | Reference |
|--------------------------------------|-----------------------|-----------------------------------------------------------|-----------|
| $\beta$ -actin                       | WFT-RNA-25F           | F: GGTATCGTCCTGGACTCTGGTG                                 | 20        |
|                                      | WFT-RNA-26F           | F: GTATCGTCCTGGACTCTGGTGA                                 | 20        |
|                                      | WFT-RNA-93R-C         | R: GGGGAAGGGCGTAACTTCA                                    | 20        |
|                                      | WFT-RNA-94R-B         | R: GGGGAAGGGCGTAACTTC                                     | 20        |
|                                      | WFT-RNA-93R-D         | R: GGGGAAGGGCGTAACTTCAT                                   | 20        |
|                                      | WFT-RNA-92R           | R: GGGGAAGGGCGTAACTTCATAG                                 | 20        |
|                                      | Actin F               | CCTCATCCCTAGTTGTCTTGTG                                    | 57        |
| Actin R                              | TTCTCGCTCAGCTGTAATTGT |                                                           |           |
| NADH-ubiquinoneoxidoreductase        | NADH                  | F: AGCTACTAAACCGCCTCATAAA<br>R: GGTGGTTATGGTATTTATCGTTTGT | 57        |
| $\alpha$ -tubulin                    | Tubulin               | F: GTGGACAACGAAGCCATCTA<br>R: CGGTTTCAGGTTGGTGTAGG        | 57        |
| heat shock protein 90                | HSP90                 | F: CTCGCAACCAGGACGATATTAG<br>R: CTGACCCTCCACAGAGAAATG     | 57        |
| heat shock protein 70                | HSP70                 | F: GTCACCGTACCCGCATATTT<br>R: GCAGTGGGCTCGTTGATAATA       | 57        |
| heat shock protein 60                | HSP60                 | F: CTGGACTGTAAGCGTGCTATAA<br>R: GGCACGATGAACACCTATGA      | 57        |
| vacuolar type H <sup>+</sup> -ATPase | ATPase                | F: TACCAAATGGGACTCCAATACC<br>R: GTAAGTAAGAGGTGGCCAGATAC   | 57        |
| ribosomal protein 132                | RPL32                 | F: CTGGCGTAAACCTAAGGGTATT<br>R: GTCTTGGCATTGCTTCCATAAC    | 57        |
|                                      |                       | F: CAACATCGGTTATGGAAGCA<br>R: ACAGCGTGGGCAATTTTCAGC       | 58        |
| 28S ribosomal RNA                    | 28S                   | F: GGGTGGTAAACTCCATCTAAGG<br>R: CACGTACTCTTGA ACTCTCTCTTC | 57        |
| 18S ribosomal RNA                    | 18S                   | F: CTGCGGAAATACTGGAGCTAATA<br>R: AAGTAGACGATGGCCGAAAC     | 57        |
|                                      |                       | F: AACACGGGAAACCTCACCA<br>R: CAGACAAATCGCTCCACCAA         | 58        |
| elongation factor 1 $\alpha$         | EF1A                  | F: AAGGAACTGCGTCGTGGATA<br>R: AGGGTGGTTCAGGACAATGA        | 57        |

EF-1 F  
EF-1 R

TCAAGGAACTGCGTCGTGGAT  
ACAGGGGTGTAGCCGTTAGAG

58

---

**Table S3.** *Thrips tabaci* EF1A primers designed from existing Genbank sequences and tested as possible internal control genes for qPCR.

| <b>Primer Name</b> | <b>Sequence</b>             |
|--------------------|-----------------------------|
| EF1A_315F          | CGACAACGTTGGTTTCAACATC      |
| EF1A_448R          | GTAGCCGTTGGAGATCTGGCCAGG    |
| EF1A_372F          | CGTCGCTGGTGACTCCAAG         |
| EF1A_478R          | GGCGGTGTGGCAATCCAGCAC       |
| <b>EF1A_346F</b>   | <b>CGTCAAGGAACTTCGTCGTG</b> |
| EF1A_322F          | GTCGGCTTCAACATCAAGAACG      |
| EF1A_414F          | CGACTTCACCGCACAGGT          |
| EF1A_481R          | AGCGGTGTGGCAATCCAG          |
| EF1A_431R          | ACCTGTGCGGTGAAGTCG          |
| <b>EF1A_456R</b>   | <b>CACAGGGGTGTATCCGTTG</b>  |

**Table S4.** *Emilia sonchifolia* internal control primers designed from existing Genbank sequences and tested as possible internal control genes for qPCR.

| <b>Gene</b>                            | <b>Primer Name</b>       | <b>Primer Sequence</b>          | <b>Reference</b> |
|----------------------------------------|--------------------------|---------------------------------|------------------|
| Sunflower profilin                     | Heli-all-nes_f2          | CGTCAATACTTGTTAATATTATTAAGAATTA | 59               |
|                                        | Heli-all-r1              | ATAGCTTGGCCCGTTTTCTT            | 59               |
| Plant tRNA                             | Plant_nes-2-f            | ATTGAGCCTTGGTATGGAAACCT         | 59               |
|                                        | Plant_nes-2-r            | GGATTTGGCTCAGGATTGCC            | 59               |
| Plant actin                            | Act-f                    | CAAGCAGCATGAAGATCAAGGT          | 59               |
|                                        | Act-r                    | CACATCTGTTGGAAAGTGCTGAG         | 59               |
| <b><i>E. sonchifolia</i> 5.8S rRNA</b> | <b>Emilia_5.8S_rRNAF</b> | <b>GTGTGAATTGCAGAATCCCGT</b>    |                  |
|                                        | <b>Emilia_5.8S_rRNAR</b> | <b>CATGTGACGCCCAGGCA</b>        |                  |
| <i>E. sonchifolia</i> ITS              | Emilia ITS2_F            | GTCACCTCCCAACACACCT             |                  |
|                                        | Emilia ITS2_R            | GCTTTTCGACCACCACTAATC           |                  |

**Table S5.** *Tomato spotted wilt virus* target gene primers from existing literature, and newly designed primers tested as targets for qPCR reactions.

| <b>Gene</b>  | <b>Primer Name</b> | <b>Primer Sequence</b>         | <b>Reference</b> |
|--------------|--------------------|--------------------------------|------------------|
| Nucleocapsid | TSWV-CP-17F        | F: CTCTTGATGATGCAAAGTCTGTGA    | 20               |
|              | TSWV-CP-100R       | R: TCTCAAAGCTATCAACTGAAGCAATAA |                  |
|              | TSWV N F           | F: GCTTCCCACCCTTTGATTC         | 17               |
|              | TSWV N R           | R: ATAGCCAAGACAACACTGATC       |                  |
|              | TSW.1              | F: TCTGGTAGCATTCAACTTCAA       | 21               |
|              | TSW.2              | R: GTTTCACTGTAATGTTCCATA       |                  |
|              | TSWV-1 For         | F: AGACAGGATTGGAGCCACTGACAT    | 22               |
|              | TSWV-1 Rev         | R: TCCCAGTTTCCTCAACAAGCCTGA    |                  |
| L RNA        | TSWVL_746F         | F: GGATGCCAATCACTGTTACTAG      |                  |
|              | TSWVL_884R         | R: CACCACTGTGGGTGTGG           |                  |
|              | TSWVL_2696F        | F: CTGTCATGATAGGAACTGTGAC      |                  |
|              | TSWVL_2877R        | R: GAGATCTTCCATTCTGAAC         |                  |
|              | TSWVL_4382F        | F: GCATGAAYTGGTTRCAAGGC        |                  |
|              | TSWVL_4493R        | R: CAGAGTGCACAATCCATCTAG       |                  |
|              | TSWVL_4656R        | R: CRGATGAAGAAGCATAACTC        |                  |
|              | TSWVL_4890F        | F: CTATTCAATGCTTCCTGGTG        |                  |
|              | TSWVL_4966R        | R: CTCTAAGGGTGTGGTACC          |                  |
|              | TSWVL_6394F        | F: CTGGACACTGCTGTATACATATC     |                  |
|              | TSWVL_6585R        | R: GTGTTCAATCACTGTTATGTG       |                  |
|              | TSWVL_6766F        | F: GGGATCATGACAAGAAGCTG        |                  |
|              | TSWVL_6970R        | R: GCAYGCATCRCCTGGTTC          |                  |
|              | TSWV_7712F         | F: CATGCCACAACAATGACTC         |                  |
|              | TSWVL_7919R        | R: GRTTCTCTCCAGATATAACAAACC    |                  |
|              | TSWVL_7993F        | F: GTGTTGAGGCTAGATGAGG         |                  |
|              | TSWVL_8192R        | R: CTRCCARTCTGTCAGTTG          |                  |

**Table S6.** Individual *Thrips tabaci* Ct values, Standard deviations, Delta Ct (normalized virus titer values), and log10 transformed Delta Ct values. Shaded rows = transmitting thrips; Non-shaded rows = non-transmitting thrips.

| Virus Isolate | Thrips Isoline | Sympatry   | Internal Control |         | Viral L RNA |           | Delta Ct SD | Delta Ct SE | Delta Ct Mean | Log10 Delta Ct |
|---------------|----------------|------------|------------------|---------|-------------|-----------|-------------|-------------|---------------|----------------|
|               |                |            | EF1A Ct          | EF1A SD | TSWV L Ct   | TSWV L SD |             |             |               |                |
| AM1           | IPOC1-1        | Sympatric  | 19.514           | 0.144   | 21          | 0.163     | 1.149       | 1.083       | 0.204         | -0.69          |
| AM1           | IPOC1-2        | Sympatric  | 21.326           | 0.043   | 23.42       | 0.169     | 1.12        | 1.068       | 0.13          | -0.887         |
| AM1           | IPOC1-3        | Sympatric  | 21.548           | 0.088   | 23.514      | 0.15      | 1.119       | 1.067       | 0.14          | -0.854         |
| AM1           | IPOC1-4        | Sympatric  | 22.911           | 0.035   | 35.675      | 0.579     | 1.46        | 1.244       | 0             | -3.932         |
| AM1           | IPOC1-5        | Sympatric  | 29.619           | 0.334   | 38.096      | 0         | 0           | 0           | 0.002         | -2.81          |
| AM1           | IPOC1-6        | Sympatric  | 20.791           | 0.018   | 36.156      | 2.134     | 4.024       | 2.676       | 0             | -4.64          |
| AM1           | IPOC1-7        | Sympatric  | 20.718           | 0.008   | 36.444      | 1.007     | 1.929       | 1.461       | 0             | -4.741         |
| AM1           | IPOC1-8        | Sympatric  | 18.416           | 0.185   | 21.763      | 0.152     | 1.112       | 1.063       | 0.055         | -1.26          |
| AM1           | IPOC1-9        | Sympatric  | 16.76            | 0.206   | 32.358      | 0.555     | 1.468       | 1.248       | 0             | -4.65          |
| AM1           | IPOC1-10       | Sympatric  | 20.896           | 0.076   | 36.934      | 0.039     | 1.055       | 1.033       | 0             | -4.832         |
| AM1           | Kin1-1         | Allopatric | 21.496           | 0.016   | 24.79       | 0.48      | 1.367       | 1.198       | 0.059         | -1.23          |
| AM1           | Kin1-2         | Allopatric | 17.577           | 0.236   | 21.513      | 0.163     | 1.199       | 1.11        | 0.044         | -1.357         |
| AM1           | Kin1-3         | Allopatric | 17.759           | 0.072   | 21.619      | 0.068     | 1.065       | 1.037       | 0.046         | -1.338         |
| AM1           | Kin1-4         | Allopatric | 18.852           | 0.055   | 22.502      | 0.248     | 1.18        | 1.1         | 0.051         | -1.294         |
| AM1           | Kin1-5         | Allopatric | 25.354           | 0.082   | 27.043      | 0.052     | 1.063       | 1.036       | 0.149         | -0.828         |
| AM1           | Kin1-6         | Allopatric | 19.891           | 0.023   | 22.455      | 0.229     | 1.162       | 1.091       | 0.1           | -1.001         |
| AM1           | Kin1-7         | Allopatric | 19.185           | 0.086   | 22.337      | 0.092     | 1.084       | 1.048       | 0.07          | -1.158         |
| AM1           | Kin1-8         | Allopatric | 19.591           | 0.376   | 24.167      | 0.178     | 1.297       | 1.162       | 0.027         | -1.566         |
| AM1           | Kin1-9         | Allopatric | 27.389           | 0.097   | 31.6        | 0.087     | 1.086       | 1.049       | 0.027         | -1.571         |
| AM1           | Kin1-10        | Allopatric | 20.958           | 0.01    | 34.622      | 0.517     | 1.401       | 1.215       | 0             | -4.16          |
| AM1           | SH2-1          | Allopatric | 20.621           | 0.239   | 24.111      | 0.173     | 1.205       | 1.113       | 0.053         | -1.273         |
| AM1           | SH2-2          | Allopatric | 21.581           | 0.091   | 21.043      | 0.258     | 1.194       | 1.108       | 0.716         | -0.145         |
| AM1           | SH2-3          | Allopatric | 19.993           | 0.061   | 37.157      | 0         | 0           | 0           | 0             | -5.138         |
| AM1           | SH2-4          | Allopatric | 20.3             | 0.058   | 23.036      | 0.088     | 1.07        | 1.04        | 0.088         | -1.055         |
| AM1           | SH2-5          | Allopatric | 19.383           | 0.078   | 22.026      | 0.065     | 1.066       | 1.038       | 0.096         | -1.016         |
| AM1           | SH2-6          | Allopatric | 20.695           | 0.011   | 36.177      | 0         | 0           | 0           | 0             | -4.671         |
| AM1           | SH2-7          | Allopatric | 17.214           | 0.022   | 33.781      | 0.605     | 1.484       | 1.322       | 0             | -4.931         |
| AM1           | SH2-8          | Allopatric | 18.25            | 0.074   | 35.38       | 0.053     | 1.059       | 1.037       | 0             | -5.105         |
| AM1           | SH2-9          | Allopatric | 18.14            | 0.042   | 34.042      | 0.642     | 1.521       | 1.345       | 0             | -4.755         |
| AM1           | SH72-1         | Allopatric | 19.842           | 0.193   | 28.218      | 0.076     | 1.139       | 1.078       | 0.002         | -2.646         |



|       |         |            |        |       |        |       |       |       |       |        |
|-------|---------|------------|--------|-------|--------|-------|-------|-------|-------|--------|
| AM1   | SH72-2  | Allopatric | 20.025 | 0.072 | 32.05  | 0.201 | 1.148 | 1.083 | 0     | -3.683 |
| AM1   | SH72-3  | Allopatric | 17.976 | 0.093 | 36.208 | 0.766 | 1.653 | 1.337 | 0     | -5.413 |
| AM1   | SH72-4  | Allopatric | 17.881 | 0.359 | 35.354 | 0     | 0     | 0     | 0     | -5.197 |
| AM1   | SH72-5  | Allopatric | 19.281 | 0.188 | 27.362 | 0.399 | 1.33  | 1.179 | 0.003 | -2.555 |
| AM1   | SH72-6  | Allopatric | 19.169 | 0.403 | 31.074 | 0.596 | 1.588 | 1.306 | 0     | -3.637 |
| AM1   | SH72-7  | Allopatric | 17.761 | 0.082 | 26.299 | 0.046 | 1.061 | 1.035 | 0.002 | -2.664 |
| AM1   | SH72-8  | Allopatric | 17.924 | 0.028 | 26.41  | 0.056 | 1.042 | 1.024 | 0.002 | -2.651 |
| AM1   | SH72-9  | Allopatric | 19.609 | 0.021 | 37.413 | 0.838 | 1.727 | 1.371 | 0     | -5.314 |
| SH3   | IPOC1-1 | Allopatric | 19.025 | 0.035 | 20.516 | 0.022 | 1.026 | 1.015 | 0.207 | -0.685 |
| SH3   | IPOC1-2 | Allopatric | 23.874 | 0.075 | 24.273 | 0.129 | 1.101 | 1.057 | 0.361 | -0.442 |
| SH3   | IPOC1-3 | Allopatric | 18.187 | 0.085 | 23.437 | 0.184 | 1.14  | 1.079 | 0.018 | -1.738 |
| SH3   | IPOC1-4 | Allopatric | 25.445 | 0.024 | 26.355 | 0.046 | 1.034 | 1.02  | 0.246 | -0.609 |
| SH3   | IPOC1-5 | Allopatric | 23.22  | 0.137 | 35.325 | 2.007 | 3.713 | 2.527 | 0     | -3.749 |
| SH3   | IPOC1-6 | Allopatric | 19.814 | 0.004 | 22.984 | 0.011 | 1.007 | 1.004 | 0.067 | -1.171 |
| SH3   | IPOC1-7 | Allopatric | 17.43  | 0.14  | 32.023 | 0.18  | 1.157 | 1.088 | 0     | -4.375 |
| SH3   | IPOC1-8 | Allopatric | 17.843 | 0.025 | 33.151 | 0.196 | 1.138 | 1.077 | 0     | -4.583 |
| SH3   | Kin1-1  | Allopatric | 25.468 | 0.328 | 35.393 | 0     | 0     | 0     | 0.001 | -3.163 |
| SH3   | Kin1-2  | Allopatric | 19.288 | 0.278 | 33.775 | 0.457 | 1.412 | 1.22  | 0     | -4.37  |
| SH3   | Kin1-3  | Allopatric | 19.801 | 0.163 | 33.902 | 0.345 | 1.28  | 1.153 | 0     | -4.268 |
| SH3   | Kin1-4  | Allopatric | 26.38  | 0.293 | 36.954 | 0     | 0     | 0     | 0     | -3.359 |
| SH3   | Kin1-5  | Allopatric | 17.613 | 0.266 | 30.873 | 0.19  | 1.229 | 1.126 | 0     | -4     |
| SH3   | SH2-1   | Sympatric  | 20.39  | 0.017 | 36.044 | 0.685 | 1.564 | 1.372 | 0     | -4.716 |
| SH3   | SH2-2   | Sympatric  | 17.822 | 0.047 | 36.781 | 0.136 | 1.098 | 1.067 | 0     | -5.617 |
| SH3   | SH2-3   | Sympatric  | 16.814 | 0.01  | 35.264 | 0.904 | 1.803 | 1.405 | 0     | -5.459 |
| SH3   | SH2-4   | Sympatric  | 17.736 | 0.033 | 35.362 | 0.679 | 1.558 | 1.292 | 0     | -5.238 |
| SH3   | SH2-5   | Sympatric  | 18.826 | 0.014 | 35.478 | 1.369 | 2.443 | 1.675 | 0     | -4.977 |
| SH3   | SH2-6   | Sympatric  | 18.207 | 0.08  | 36.599 | 0     | 0     | 0     | 0     | -5.462 |
| SH3   | SH2-7   | Sympatric  | 20.203 | 0.014 | 35.935 | 0.752 | 1.634 | 1.328 | 0     | -4.736 |
| SH3   | SH2-8   | Sympatric  | 16.318 | 0.04  | 36.075 | 1.116 | 2.071 | 1.673 | 0     | -5.822 |
| SH3   | SH2-9   | Sympatric  | 17.263 | 0.06  | 34.887 | 0     | 0     | 0     | 0     | -5.231 |
| SH3   | SH2-10  | Sympatric  | 17.353 | 0.03  | 35.854 | 0.983 | 1.899 | 1.448 | 0     | -5.481 |
| SR3-3 | IPOC1-1 | Sympatric  | 23.539 | 0.01  | 25.903 | 0.023 | 1.017 | 1.01  | 0.101 | -0.994 |
| SR3-3 | IPOC1-2 | Sympatric  | 36.016 | 0     | 36.207 | 0     | 0     | 0     | 0.281 | -0.551 |
| SR3-3 | IPOC1-3 | Sympatric  | 19.802 | 0.006 | 22.218 | 0.073 | 1.049 | 1.028 | 0.11  | -0.957 |
| SR3-3 | IPOC1-4 | Sympatric  | 20.321 | 0.068 | 34.678 | 1.007 | 1.932 | 1.593 | 0     | -4.348 |

|       |         |            |        |       |        |       |       |       |       |        |
|-------|---------|------------|--------|-------|--------|-------|-------|-------|-------|--------|
| SR3-3 | IPOC1-5 | Sympatric  | 19.597 | 0.314 | 37.249 | 0     | 0     | 0     | 0     | -5.271 |
| SR3-3 | IPOC1-6 | Sympatric  | 21.626 | 0.058 | 36.914 | 0.231 | 1.167 | 1.114 | 0     | -4.629 |
| SR3-3 | IPOC1-7 | Sympatric  | 21.351 | 0.067 | 24.651 | 0.035 | 1.049 | 1.028 | 0.059 | -1.229 |
| SR3-3 | IPOC1-8 | Sympatric  | 19.673 | 0.026 | 21.937 | 0.01  | 1.018 | 1.01  | 0.122 | -0.913 |
| SR3-3 | Kin1-1  | Allopatric | 23.856 | 0.063 | 25.507 | 0.041 | 1.049 | 1.028 | 0.16  | -0.797 |
| SR3-3 | Kin1-2  | Allopatric | 18.779 | 0.052 | 22.546 | 0.02  | 1.036 | 1.02  | 0.047 | -1.326 |
| SR3-3 | Kin1-3  | Allopatric | 22.878 | 0.134 | 35.831 | 0.266 | 1.212 | 1.141 | 0     | -3.985 |
| SR3-3 | Kin1-4  | Allopatric | 21.337 | 0.102 | 35.025 | 0.483 | 1.379 | 1.204 | 0     | -4.172 |
| SR3-3 | Kin1-5  | Allopatric | 19.501 | 0.124 | 34.377 | 0.608 | 1.497 | 1.263 | 0     | -4.483 |
| SR3-3 | Kin1-6  | Allopatric | 18.88  | 0.024 | 31.279 | 0.035 | 1.028 | 1.016 | 0     | -3.773 |
| SR3-3 | Kin1-7  | Allopatric | 23.009 | 0.056 | 35.132 | 0     | 0     | 0     | 0     | -3.752 |
| SR3-3 | SH2-1   | Allopatric | 20.869 | 0.116 | 23.071 | 0.096 | 1.1   | 1.057 | 0.123 | -0.912 |
| SR3-3 | SH2-2   | Allopatric | 23.639 | 0.114 | 36.64  | 0     | 0     | 0     | 0     | -4.009 |
| SR3-3 | SH2-3   | Allopatric | 20.394 | 0.074 | 22.957 | 0.028 | 1.05  | 1.029 | 0.098 | -1.007 |
| SR3-3 | SH2-4   | Allopatric | 21.708 | 0.092 | 24.851 | 0.055 | 1.07  | 1.04  | 0.065 | -1.19  |
| SR3-3 | SH2-5   | Allopatric | 20.952 | 0.318 | 21.864 | 0.093 | 1.23  | 1.127 | 0.284 | -0.547 |
| SR3-3 | SH2-6   | Allopatric | 19.744 | 0.031 | 22.414 | 0.007 | 1.02  | 1.011 | 0.094 | -1.029 |
| SR3-3 | SH2-7   | Allopatric | 20.203 | 0.113 | 36.206 | 0     | 0     | 0     | 0     | -4.812 |
| SR3-3 | SH2-8   | Allopatric | 34.867 | 0.928 | 32.584 | 1.04  | 2.435 | 1.672 | 1.466 | 0.166  |
| SR3-3 | SH2-9   | Allopatric | 20.103 | 0.015 | 22.796 | 0.033 | 1.024 | 1.014 | 0.091 | -1.04  |
| SR3-3 | SH72-1  | Allopatric | 38.784 | 0.07  | 35.699 | 1.326 | 2.378 | 1.649 | 2.184 | 0.339  |
| SR3-3 | SH72-2  | Allopatric | 20.577 | 0.034 | 23.067 | 0.032 | 1.03  | 1.017 | 0.103 | -0.989 |
| SR3-3 | SH72-3  | Allopatric | 19.537 | 0.014 | 26.011 | 0.027 | 1.15  | 1.084 | 0.008 | -2.073 |
| SR3-3 | SH72-4  | Allopatric | 20.278 | 0.215 | 26.609 | 0.063 | 1.294 | 1.161 | 0.013 | -1.892 |
| SR3-3 | SH72-5  | Allopatric | 19.981 | 0.047 | 25.004 | 0.18  | 1.129 | 1.072 | 0.02  | -1.698 |
| SR3-3 | SH72-6  | Allopatric | 25.792 | 0.067 | 0      | 0     | 0     | 0     | 0     | 0      |
| SR3-3 | SH72-7  | Allopatric | 22.153 | 0.11  | 35.986 | 0     | 0     | 0     | 0     | -4.225 |
| SR3-3 | SH72-8  | Allopatric | 20.765 | 0.089 | 35.481 | 0.025 | 1.059 | 1.034 | 0     | -4.456 |
| SR3-3 | SH72-9  | Allopatric | 29.948 | 0.166 | 35.95  | 0.652 | 1.549 | 1.358 | 0.008 | -2.113 |
| SHP   | SH2-1   | Sympatric  | 18.822 | 0.108 | 21.629 | 0.107 | 1.102 | 1.057 | 0.088 | -1.055 |
| SHP   | SH2-2   | Sympatric  | 18.391 | 0.046 | 22.988 | 1.456 | 2.587 | 1.731 | 0.028 | -1.556 |
| SHP   | SH2-3   | Sympatric  | 20.036 | 0.164 | 22.595 | 0.166 | 1.16  | 1.09  | 0.1   | -1.001 |
| SHP   | SH2-4   | Sympatric  | 19.764 | 0.046 | 22.956 | 0.082 | 1.063 | 1.036 | 0.067 | -1.177 |
| SHP   | SH2-5   | Sympatric  | 23.045 | 0.074 | 24.37  | 0.077 | 1.071 | 1.04  | 0.203 | -0.693 |
| SHP   | SH2-6   | Sympatric  | 26.503 | 0.065 | 28.727 | 0.089 | 1.073 | 1.042 | 0.101 | -0.996 |

|     |        |           |        |       |        |       |       |       |       |        |
|-----|--------|-----------|--------|-------|--------|-------|-------|-------|-------|--------|
| SHP | SH2-7  | Sympatric | 18.23  | 0.381 | 24.342 | 0.04  | 1.269 | 1.147 | 0.01  | -1.983 |
| SHP | SH2-8  | Sympatric | 27.938 | 0.198 | 36.227 | 0     | 0     | 0     | 0.002 | -2.734 |
| SHP | SH2-9  | Sympatric | 18.354 | 0.078 | 33.948 | 0.915 | 1.82  | 1.413 | 0     | -4.671 |
| SHP | SH2-10 | Sympatric | 19.939 | 0.078 | 21.807 | 0.087 | 1.077 | 1.044 | 0.157 | -0.804 |
| SHP | SH2-11 | Sympatric | 18.55  | 0.042 | 23.214 | 0.062 | 1.049 | 1.028 | 0.026 | -1.577 |

---

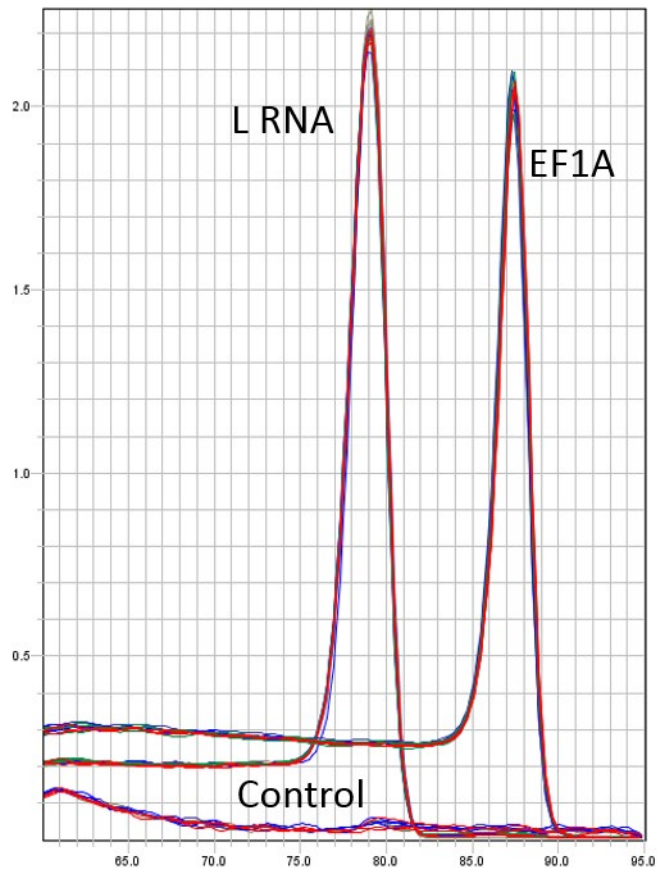

**Figure S1.** *Thrips tabaci* internal control and L RNA melt curves. The thrips internal control (EF1A) primers and TSWV target (L RNA) are shown for multiple samples with sharp single peaks indicating high specificity, amplification, and one product for each primer pair. Negative controls with no template controls are also shown to indicate no contamination or primer dimers.

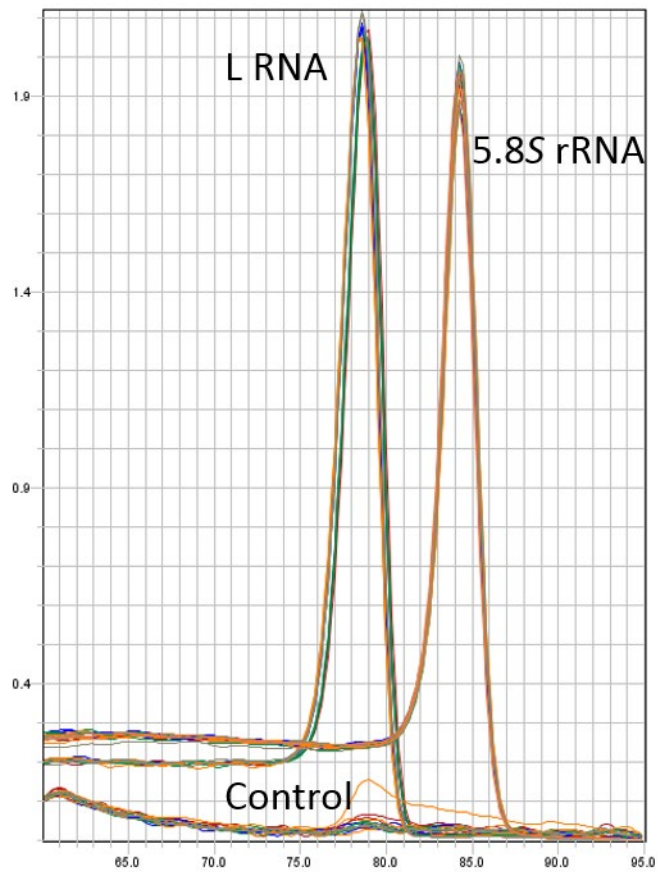

**Figure S2.** *Emilia sonchifolia* internal control and L RNA melt curves. The leaf tissue internal control (5.8S rRNA) primers and TSWV target (L RNA) are shown for multiple samples with sharp single peaks indicating high specificity, amplification, and one product for each primer pair. Negative controls with no template are also shown to indicate no contamination or primer dimers.

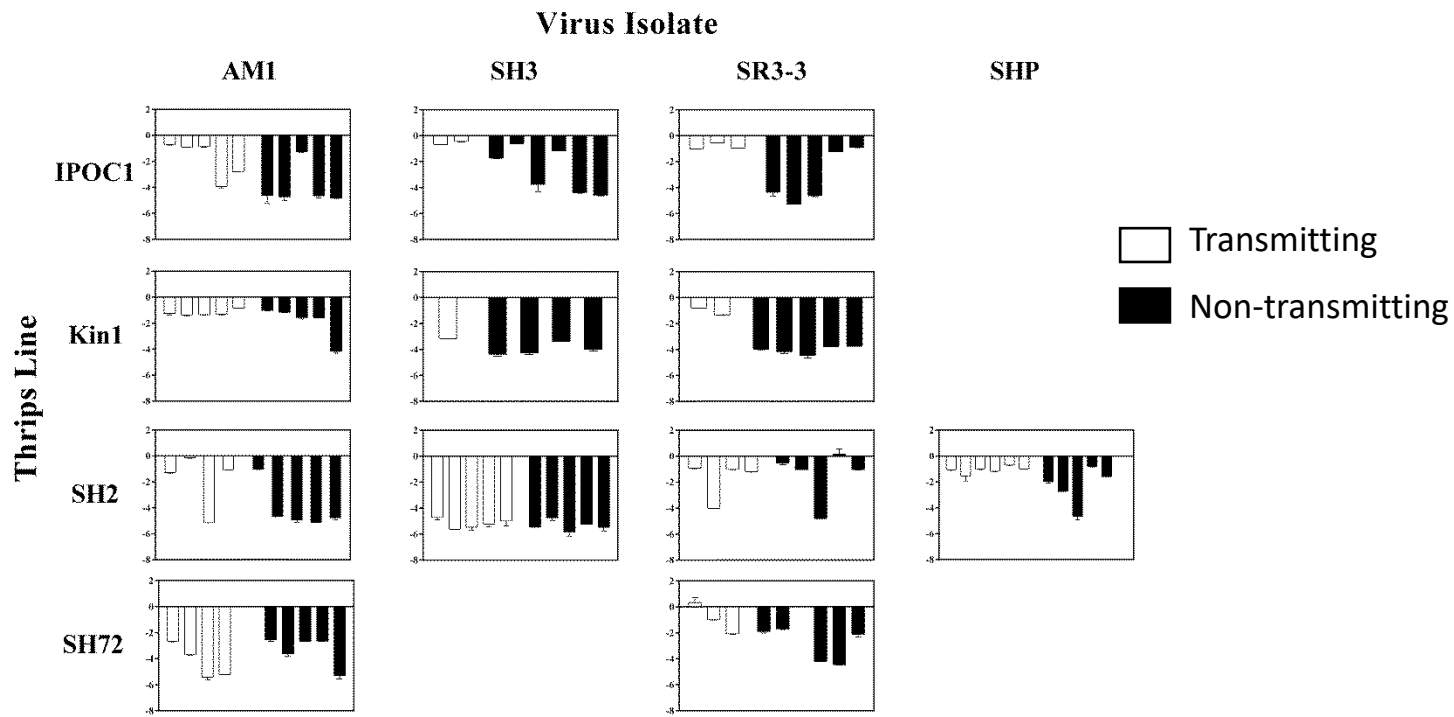

**Figure S3.** Normalized  $\log_{10}$  transformed virus titer for each individual *Thrips tabaci* for all thrips tested. Means are presented for each single *T. tabaci* tested for TSWV titer and shown for all virus isolates and thrips isofemale lines separately. Transmitting individuals are in white solid bars and non-transmitting individuals are in black solid bars.
